# Supplementary material for: Study on the inter- and intra-peptide salt-bridge mechanism of Aβ23–28 oligomer interaction with small molecules: QM/MM method
Source: Royal Society of Chemistry journal article supplement (doi:10.1039/c5mb00066a), 2015-04-23
Supplement: c5mb00066a1.pdf [file c5mb00066a1.pdf]

## Study on the Inter- and Intra-Salt-bridge Mechanism of A $\beta$ <sub>23-28</sub> Oligomer interaction with small molecules: QM/MM

### Method

*Subramaniam Boopathi, Ponmalai Kolandaivel\**

Department of Physics, Bharathiar University, Coimbatore-46, Tamilnadu, India.

\*Corresponding author: [ponkvel@hotmail.com](mailto:ponkvel@hotmail.com)

Fax: +91-422-2422387

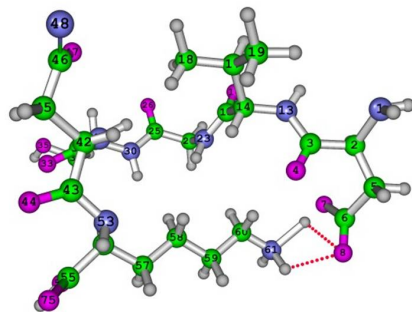

Monomer

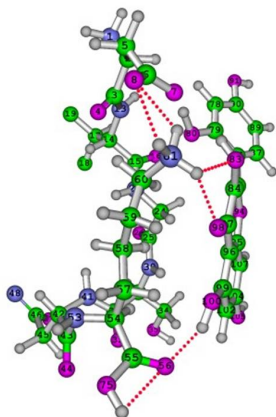

Monomer...Morin

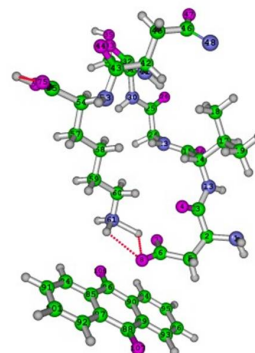

Monomer...AQ

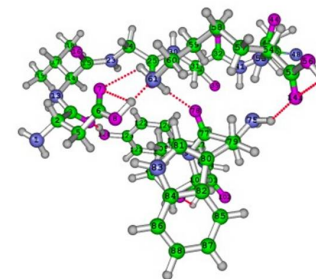

Monomer...TPT

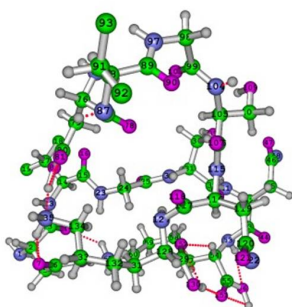

Dimer-i

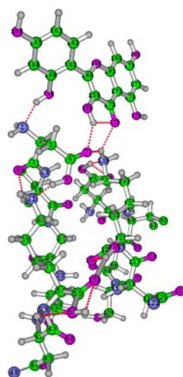

Dimer-i...Morin

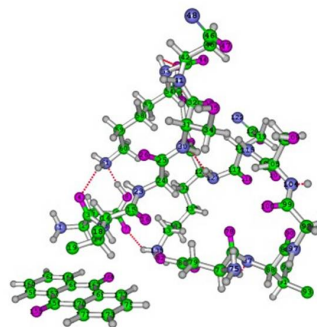

Dimer-i...AQ

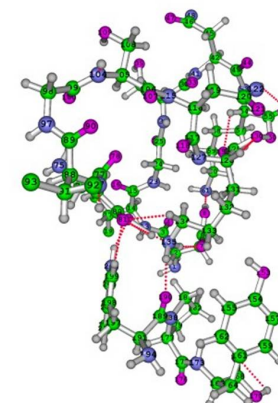

Dimer-i...TPT

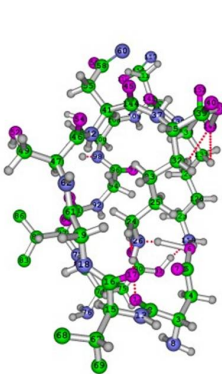

Dimer-ii

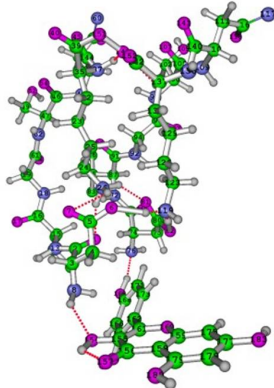

Dimer-ii...Morin

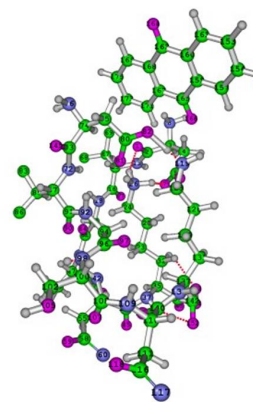

Dimer-ii...AQ

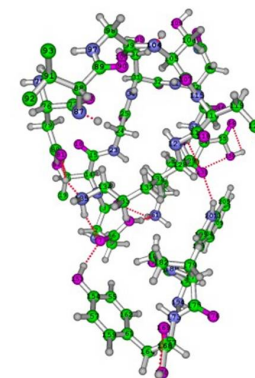

Dimer-ii...TPT

● → Oxygen   
 ● → Nitrogen   
 ● → Carbon   
 ● → Hydrogen

**Fig. S1** Optimized structure of monomer, dimer-i and dimer-ii structure with Morin, AQ and TPT molecules at ONIOM(M05-2X/6-31G\*:UFF) level of theory.

**Input file preparation for dimer structure are given below**

```
#ONIOM(M052X/6-31++G(d,p):UFF) OPT
```

```
dimer
```

```
0 1 0 1 0 1
```

```
7 8.342335158 -3.579943415 -0.661355115 H
6 6.969078158 -3.451724415 -0.188625115 H
6 6.068866158 -2.843277415 -1.269442115 H
8 6.403511158 -1.799517415 -1.789425115 H
6 6.944567158 -2.514988415 1.029276885 H
6 5.555780158 -2.533880415 1.647138885 H
8 5.159726158 -3.536378415 2.207913885 H
8 4.796018158 -1.467264415 1.490736885 H
1 8.606761158 -2.708707415 -1.110612115 H
1 6.607284158 -4.428977415 0.129938885 H
1 7.652454158 -2.908363415 1.756775885 H
1 7.250510158 -1.514620415 0.719758885 H
7 4.852452158 -3.517539415 -1.670575115 L H 3
6 4.092353158 -3.133841415 -2.866262115 L
6 2.751710158 -2.576727415 -2.433518115 L
8 1.714008158 -3.067717415 -2.848693115 L
6 3.978474158 -4.343281415 -3.827594115 L
6 3.343218158 -3.948469415 -5.119895115 L
6 5.326720158 -4.903905415 -4.136083115 L
1 4.520593158 -4.333953415 -1.108096115 L
1 4.622846158 -2.318403415 -3.407763115 L
1 3.368139158 -5.143967415 -3.357215115 L
7 2.713798158 -1.508379415 -1.594611115 L
6 1.477752158 -0.831910415 -1.195005115 L
6 1.215292158 0.366534585 -2.066574115 L
8 1.991032158 0.641836585 -2.968480115 L
1 3.613350158 -1.084853415 -1.278273115 L
1 0.609708158 -1.523947415 -1.245017115 L
1 1.579735158 -0.501368415 -0.141624115 L
```

|   |              |             |              |        |
|---|--------------|-------------|--------------|--------|
| 7 | 0.108359158  | 1.127438585 | -1.853070115 | L      |
| 6 | -0.281365842 | 2.256418585 | -2.712267115 | L      |
| 6 | -0.443416842 | 3.521491585 | -1.900307115 | L      |
| 8 | -0.783592842 | 3.452650585 | -0.731045115 | L      |
| 6 | -1.593316842 | 1.914394585 | -3.434000115 | L      |
| 8 | -1.916728842 | 2.897095585 | -4.380826115 | L      |
| 1 | -0.544016842 | 0.849768585 | -1.084609115 | L      |
| 1 | 0.496624158  | 2.438399585 | -3.486023115 | L      |
| 1 | -1.504299842 | 0.921940585 | -3.932316115 | L      |
| 1 | -2.420784842 | 1.845081585 | -2.697878115 | L      |
| 1 | -1.309817842 | 2.758123585 | -5.154033115 | L      |
| 7 | -0.244007842 | 4.733552585 | -2.487929115 | L      |
| 6 | -0.574902842 | 6.027077585 | -1.869090115 | L      |
| 6 | 0.197160158  | 6.233442585 | -0.582954115 | L H 53 |
| 8 | -0.359302842 | 6.693069585 | 0.406511885  | L      |
| 6 | -2.102302842 | 6.174743585 | -1.678288115 | L      |
| 6 | -2.851982842 | 5.964761585 | -2.961895115 | L      |
| 8 | -3.656266842 | 5.055089585 | -3.058120115 | L      |
| 7 | -2.652184842 | 6.789795585 | -4.007395115 | L      |
| 1 | 0.042303158  | 4.756918585 | -3.493269115 | L      |
| 1 | -0.242347842 | 6.833326585 | -2.560192115 | L      |
| 1 | -2.460897842 | 5.451139585 | -0.913463115 | L      |
| 1 | -2.332904842 | 7.196223585 | -1.304936115 | L      |
| 7 | 1.590136158  | 5.969069585 | -0.555930115 | H      |
| 6 | 1.977990158  | 5.134701585 | 0.575858885  | H      |
| 6 | 2.175487158  | 5.850575585 | 1.899763885  | H      |
| 8 | 2.409919158  | 7.163760585 | 1.783282885  | H      |
| 6 | 3.299180158  | 4.395137585 | 0.294077885  | H      |
| 6 | 3.147417158  | 3.404892585 | -0.857519115 | H      |
| 6 | 4.371953158  | 2.497587585 | -1.009454115 | H      |
| 6 | 4.493047158  | 1.487478585 | 0.130468885  | H      |
| 7 | 5.624994158  | 0.551775585 | -0.008656115 | H      |
| 1 | 2.085619158  | 6.851721585 | -0.542175115 | H      |
| 1 | 1.246137158  | 4.349125585 | 0.766052885  | H      |
| 1 | 4.085059158  | 5.125267585 | 0.069197885  | H      |
| 1 | 3.581779158  | 3.872067585 | 1.209601885  | H      |
| 1 | 2.267004158  | 2.787030585 | -0.665418115 | H      |
| 1 | 2.962084158  | 3.957879585 | -1.778527115 | H      |
| 1 | 4.301869158  | 1.944594585 | -1.951437115 | H      |
| 1 | 5.285687158  | 3.100986585 | -1.064713115 | H      |
| 1 | 4.609788158  | 1.987142585 | 1.092383885  | H      |
| 1 | 3.574080158  | 0.903628585 | 0.201686885  | H      |
| 1 | 6.502471158  | 1.043116585 | 0.123642885  | H      |

|   |              |              |              |        |
|---|--------------|--------------|--------------|--------|
| 1 | 5.308007130  | -0.516505578 | 0.818558139  | H      |
| 1 | 5.658528158  | 0.157034585  | -0.945288115 | H      |
| 7 | -3.155577842 | -4.970342415 | -2.299464115 | H      |
| 6 | -2.248127842 | -5.135300415 | -1.161920115 | H      |
| 6 | -2.809502842 | -4.217454415 | -0.068607115 | H      |
| 8 | -2.670197842 | -3.020955415 | -0.171456115 | H      |
| 6 | -0.803777842 | -4.735395415 | -1.449004115 | H      |
| 6 | 0.066256158  | -4.905263415 | -0.224812115 | H      |
| 8 | -0.417220842 | -5.156050415 | 0.870466885  | H      |
| 8 | 1.346471158  | -4.734589415 | -0.452537115 | H      |
| 1 | -3.122564842 | -3.998248415 | -2.588794115 | H      |
| 1 | -2.284992842 | -6.174731415 | -0.834722115 | H      |
| 1 | -0.386037842 | -5.312531415 | -2.277334115 | H      |
| 1 | -0.776265842 | -3.680512415 | -1.733820115 | H      |
| 7 | -3.561334842 | -4.763235415 | 1.044791885  | L H 77 |
| 6 | -4.895592842 | -5.221590415 | 0.613500885  | L      |
| 6 | -5.731221842 | -4.032960415 | 0.172089885  | L      |
| 8 | -5.956805842 | -3.131700415 | 0.964545885  | L      |
| 6 | -5.582236842 | -6.025114415 | 1.747482885  | L      |
| 6 | -5.721866842 | -5.231891415 | 3.005376885  | L      |
| 6 | -6.927361842 | -6.516962415 | 1.326930885  | L      |
| 1 | -3.019773842 | -5.574262415 | 1.424310885  | L      |
| 1 | -4.778452842 | -5.928317415 | -0.240221115 | L      |
| 1 | -4.961433842 | -6.916804415 | 1.978736885  | L      |
| 7 | -6.185071842 | -3.947289415 | -1.107827115 | L      |
| 6 | -6.809960842 | -2.736124415 | -1.640259115 | L      |
| 6 | -5.778209842 | -1.652393415 | -1.778017115 | L      |
| 8 | -4.862650842 | -1.806569415 | -2.569534115 | L      |
| 1 | -5.966767842 | -4.713920415 | -1.783636115 | L      |
| 1 | -7.248140842 | -2.950156415 | -2.638868115 | L      |
| 1 | -7.642408842 | -2.421259415 | -0.974033115 | L      |
| 7 | -5.848409842 | -0.533885415 | -1.007099115 | L      |
| 6 | -4.797853842 | 0.494839585  | -0.963197115 | L      |
| 6 | -4.193991842 | 0.576712585  | 0.422281885  | L      |
| 8 | -4.697286842 | -0.048826415 | 1.341039885  | L      |
| 6 | -5.388994842 | 1.851948585  | -1.375579115 | L      |
| 8 | -5.917200842 | 1.782795585  | -2.672571115 | L      |
| 1 | -6.666556842 | -0.414869415 | -0.366171115 | L      |
| 1 | -3.975044842 | 0.244354585  | -1.667607115 | L      |
| 1 | -6.204922842 | 2.131772585  | -0.674970115 | L      |
| 1 | -4.615658842 | 2.652079585  | -1.326387115 | L      |
| 1 | -5.143174842 | 1.785723585  | -3.294599115 | L      |
| 7 | -3.085772842 | 1.340269585  | 0.631750885  | L      |

|   |              |              |              |         |
|---|--------------|--------------|--------------|---------|
| 6 | -2.399940842 | 1.522838585  | 1.920614885  | L       |
| 6 | -1.775653842 | 0.220873585  | 2.389108885  | L H 127 |
| 8 | -2.475315842 | -0.654060415 | 2.875746885  | L       |
| 6 | -3.338438842 | 2.147950585  | 2.974581885  | L       |
| 6 | -2.579589842 | 2.630980585  | 4.177032885  | L       |
| 8 | -2.739325842 | 2.093435585  | 5.258190885  | L       |
| 7 | -1.731721842 | 3.671972585  | 4.070388885  | L       |
| 1 | -2.673237842 | 1.832783585  | -0.190277115 | L       |
| 1 | -1.578770842 | 2.251599585  | 1.747211885  | L       |
| 1 | -3.872330842 | 3.013593585  | 2.525776885  | L       |
| 1 | -4.108509842 | 1.414133585  | 3.295161885  | L       |
| 7 | -0.395001842 | -0.032870415 | 2.207561885  | H       |
| 6 | 0.449075158  | 0.626372585  | 3.198245885  | H       |
| 6 | 1.000436158  | 1.955759585  | 2.723927885  | H       |
| 8 | 1.315311158  | 2.771083585  | 3.724105885  | H       |
| 6 | 1.669990158  | -0.274254415 | 3.488519885  | H       |
| 6 | 1.228358158  | -1.577485415 | 4.165345885  | H       |
| 6 | 2.038580158  | -2.801865415 | 3.736151885  | H       |
| 6 | 1.779270158  | -3.174856415 | 2.277624885  | H       |
| 7 | 2.346095158  | -4.482342415 | 1.902122885  | H       |
| 1 | -0.122790842 | 0.244358585  | 1.273977885  | H       |
| 1 | -0.072176842 | 0.792108585  | 4.144026885  | H       |
| 1 | 2.158204158  | -0.475072415 | 2.531458885  | H       |
| 1 | 2.391931158  | 0.261039585  | 4.110928885  | H       |
| 1 | 1.281385158  | -1.456122415 | 5.250686885  | H       |
| 1 | 0.182730158  | -1.760604415 | 3.906202885  | H       |
| 1 | 3.110792158  | -2.638733415 | 3.879380885  | H       |
| 1 | 1.753515158  | -3.652302415 | 4.365348885  | H       |
| 1 | 0.706914158  | -3.208417415 | 2.078765885  | H       |
| 1 | 2.219611158  | -2.436608415 | 1.607566885  | H       |
| 1 | 1.922965158  | -5.210152415 | 2.468973885  | H       |
| 1 | 1.961832870  | -4.662034422 | 0.813555861  | H       |
| 1 | 3.348433158  | -4.464422415 | 2.074089885  | H       |
| 1 | 8.402927158  | -4.304678415 | -1.367821115 | H       |
| 1 | -2.830483842 | -5.527447415 | -3.081121115 | H       |
| 8 | 2.193865158  | 5.305336585  | 2.986898885  | H       |
| 8 | 1.192103158  | 2.220431585  | 1.550872885  | H       |
| 1 | 2.573613158  | 7.499875585  | 2.680239885  | H       |
| 1 | 1.688674158  | 3.609346585  | 3.366608885  | H       |

--link1--

#ONIOM(M052X/6-31++G(d,p):UFF) OPT

Morin-dimer

0 1 0 1 0 1

|   |              |              |              |       |
|---|--------------|--------------|--------------|-------|
| 7 | -5.731896130 | -3.263917358 | -2.559623019 | H     |
| 6 | -4.836209130 | -2.401216358 | -1.782715019 | H     |
| 6 | -3.517662130 | -2.191687358 | -2.529758019 | H     |
| 8 | -2.990019130 | -3.147157358 | -3.058504019 | H     |
| 6 | -4.524489130 | -3.088468358 | -0.438704019 | H     |
| 6 | -3.633211130 | -2.184829358 | 0.401705981  | H     |
| 8 | -4.104854130 | -1.307393358 | 1.098977981  | H     |
| 8 | -2.329722130 | -2.329656358 | 0.276351981  | H     |
| 1 | -5.223369130 | -4.107757358 | -2.807679019 | H     |
| 1 | -5.345948130 | -1.459920358 | -1.573937019 | H     |
| 1 | -5.466977130 | -3.234804358 | 0.086774981  | H     |
| 1 | -4.037200130 | -4.045651358 | -0.639237019 | H     |
| 7 | -2.930699130 | -0.872869358 | -2.611748019 | L H 3 |
| 6 | -1.729343130 | -0.588204358 | -3.403664019 | L     |
| 6 | -0.626510130 | -0.129844358 | -2.476781019 | L     |
| 8 | -0.717065130 | 0.953983642  | -1.923949019 | L     |
| 6 | -2.040921130 | 0.466788642  | -4.488515019 | L     |
| 6 | -0.835940130 | 0.755172642  | -5.321173019 | L     |
| 6 | -3.126308130 | -0.012868358 | -5.392496019 | L     |
| 1 | -3.391689130 | -0.089610358 | -2.097170019 | L     |
| 1 | -1.395054130 | -1.512895358 | -3.925818019 | L     |
| 1 | -2.377664130 | 1.412701642  | -4.017232019 | L     |
| 7 | 0.449870870  | -0.927797358 | -2.251633019 | L     |
| 6 | 1.594053870  | -0.533109358 | -1.423205019 | L     |
| 6 | 2.896221870  | -0.931171358 | -2.065350019 | L     |
| 8 | 2.903079870  | -1.398447358 | -3.193455019 | L     |
| 1 | 0.450735870  | -1.893854358 | -2.650148019 | L     |
| 1 | 1.608607870  | 0.563463642  | -1.242909019 | L     |
| 1 | 1.510437870  | -1.041207358 | -0.442744019 | L     |
| 7 | 4.058640870  | -0.770432358 | -1.379253019 | L     |
| 6 | 5.372708870  | -1.176372358 | -1.895339019 | L     |
| 6 | 6.044018870  | -2.105449358 | -0.910527019 | L     |
| 8 | 6.225723870  | -1.729140358 | 0.236563981  | L     |
| 6 | 6.235717870  | 0.068288642  | -2.142815019 | L     |
| 8 | 7.465612870  | -0.284052358 | -2.717266019 | L     |
| 1 | 4.018361870  | -0.336246358 | -0.429159019 | L     |
| 1 | 5.261609870  | -1.698251358 | -2.870930019 | L     |
| 1 | 5.693887870  | 0.780714642  | -2.806189019 | L     |
| 1 | 6.430324870  | 0.587636642  | -1.184057019 | L     |
| 1 | 7.283918870  | -0.498417358 | -3.669404019 | L     |

|   |              |              |              |        |
|---|--------------|--------------|--------------|--------|
| 7 | 6.457002870  | -3.342703358 | -1.304114019 | L      |
| 6 | 7.256248870  | -4.257253358 | -0.474015019 | L      |
| 6 | 6.513692870  | -4.623871358 | 0.791739981  | L H 53 |
| 8 | 7.004419870  | -4.402349358 | 1.891516981  | L      |
| 6 | 8.664620870  | -3.680516358 | -0.205451019 | L      |
| 6 | 9.395085870  | -3.381338358 | -1.482566019 | L      |
| 8 | 9.719740870  | -2.237904358 | -1.747935019 | L      |
| 7 | 9.708441870  | -4.376506358 | -2.334215019 | L      |
| 1 | 6.288091870  | -3.637682358 | -2.292639019 | L      |
| 1 | 7.390979870  | -5.207871358 | -1.037202019 | L      |
| 1 | 8.590058870  | -2.756730358 | 0.408598981  | L      |
| 1 | 9.262596870  | -4.417385358 | 0.373835981  | L      |
| 7 | 5.275664870  | -5.304846358 | 0.687592981  | H      |
| 6 | 4.213184870  | -4.689879358 | 1.472948981  | H      |
| 6 | 4.132733870  | -5.117781358 | 2.929672981  | H      |
| 8 | 4.944594870  | -6.130756358 | 3.256606981  | H      |
| 6 | 2.835738870  | -4.996123358 | 0.852767981  | H      |
| 6 | 2.706210870  | -4.360272358 | -0.526810019 | H      |
| 6 | 1.361157870  | -4.657702358 | -1.193690019 | H      |
| 6 | 0.178727870  | -4.129162358 | -0.384527019 | H      |
| 7 | -1.121490130 | -4.204920358 | -1.075469019 | H      |
| 1 | 5.416526870  | -6.269631358 | 0.957978981  | H      |
| 1 | 4.292004870  | -3.599945358 | 1.483028981  | H      |
| 1 | 2.704324870  | -6.082926358 | 0.786759981  | H      |
| 1 | 2.071490870  | -4.603742358 | 1.525027981  | H      |
| 1 | 2.823584870  | -3.280157358 | -0.410633019 | H      |
| 1 | 3.524310870  | -4.714439358 | -1.154948019 | H      |
| 1 | 1.344579870  | -4.193790358 | -2.185037019 | H      |
| 1 | 1.246357870  | -5.736593358 | -1.347706019 | H      |
| 1 | 0.070779870  | -4.675630358 | 0.552763981  | H      |
| 1 | 0.349166870  | -3.084906358 | -0.114462019 | H      |
| 1 | -1.420579130 | -5.168810358 | -1.175342019 | H      |
| 1 | -1.701197870 | -3.527008642 | -0.559221981 | H      |
| 1 | -1.061850130 | -3.826516358 | -2.016686019 | H      |
| 7 | -0.063606130 | 5.920802642  | -3.243729019 | H      |
| 6 | -1.021688130 | 5.441164642  | -2.245191019 | H      |
| 6 | -0.174621130 | 5.079701642  | -1.016963019 | H      |
| 8 | 0.501702870  | 4.077718642  | -1.040434019 | H      |
| 6 | -1.813000130 | 4.205875642  | -2.671984019 | H      |
| 6 | -2.653651130 | 3.677905642  | -1.528669019 | H      |
| 8 | -2.679675130 | 4.251215642  | -0.447317019 | H      |
| 8 | -3.290205130 | 2.564407642  | -1.791420019 | H      |
| 1 | 0.591594870  | 5.169814642  | -3.436441019 | H      |



|   |              |              |              |         |
|---|--------------|--------------|--------------|---------|
| 1 | -1.707901130 | 6.252051642  | -2.000582019 | H       |
| 1 | -2.454656130 | 4.422136642  | -3.530327019 | H       |
| 1 | -1.119957130 | 3.417918642  | -2.972592019 | H       |
| 7 | -0.141135130 | 5.947920642  | 0.143595981  | L H 77  |
| 6 | 0.641071870  | 7.167419642  | -0.130450019 | L       |
| 6 | 2.118504870  | 6.823774642  | -0.193779019 | L       |
| 8 | 2.676803870  | 6.388829642  | 0.801169981  | L       |
| 6 | 0.342460870  | 8.257638642  | 0.932739981  | L       |
| 6 | 0.616890870  | 7.789922642  | 2.324574981  | L       |
| 6 | 1.124686870  | 9.501855642  | 0.671004981  | L       |
| 1 | -1.129079130 | 6.207112642  | 0.370643981  | L       |
| 1 | 0.321143870  | 7.599709642  | -1.106495019 | L       |
| 1 | -0.733839130 | 8.526477642  | 0.874556981  | L       |
| 7 | 2.811935870  | 6.978903642  | -1.354060019 | L       |
| 6 | 4.246648870  | 6.709871642  | -1.467008019 | L       |
| 6 | 4.534070870  | 5.246283642  | -1.273320019 | L       |
| 8 | 4.060359870  | 4.440774642  | -2.057862019 | L       |
| 1 | 2.317589870  | 7.327706642  | -2.206205019 | L       |
| 1 | 4.601297870  | 7.011352642  | -2.476219019 | L       |
| 1 | 4.795858870  | 7.330690642  | -0.726362019 | L       |
| 7 | 5.309035870  | 4.831937642  | -0.234114019 | L       |
| 6 | 5.650956870  | 3.425428642  | 0.028899981  | L       |
| 6 | 5.047103870  | 2.968220642  | 1.337547981  | L       |
| 8 | 4.540016870  | 3.785679642  | 2.089331981  | L       |
| 6 | 7.179910870  | 3.271088642  | 0.063347981  | L       |
| 8 | 7.740406870  | 3.661219642  | -1.161303019 | L       |
| 1 | 5.692491870  | 5.549378642  | 0.423641981  | L       |
| 1 | 5.249371870  | 2.768430642  | -0.773364019 | L       |
| 1 | 7.601331870  | 3.914370642  | 0.865636981  | L       |
| 1 | 7.469295870  | 2.221402642  | 0.294808981  | L       |
| 1 | 7.546205870  | 2.933017642  | -1.807517019 | L       |
| 7 | 5.060507870  | 1.645863642  | 1.666769981  | L       |
| 6 | 4.536124870  | 1.091538642  | 2.922472981  | L       |
| 6 | 3.073807870  | 1.464993642  | 3.098850981  | L H 127 |
| 8 | 2.740445870  | 2.279096642  | 3.948281981  | L       |
| 6 | 5.432933870  | 1.505385642  | 4.108970981  | L       |
| 6 | 5.071181870  | 0.767340642  | 5.366826981  | L       |
| 8 | 4.669210870  | 1.378758642  | 6.340463981  | L       |
| 7 | 5.202965870  | -0.571693358 | 5.430271981  | L       |
| 1 | 5.513372870  | 0.972617642  | 1.009643981  | L       |
| 1 | 4.584107870  | -0.017600358 | 2.846741981  | L       |
| 1 | 6.492591870  | 1.276439642  | 3.863060981  | L       |
| 1 | 5.362920870  | 2.601739642  | 4.279941981  | L       |

|   |               |              |              |   |
|---|---------------|--------------|--------------|---|
| 7 | 2.060786870   | 0.866001642  | 2.269117981  | H |
| 6 | 1.398335870   | -0.204739358 | 2.984363981  | H |
| 6 | 2.030856870   | -1.566634358 | 2.765870981  | H |
| 8 | 1.752601870   | -2.411076358 | 3.750626981  | H |
| 6 | -0.082549130  | -0.237192358 | 2.491897981  | H |
| 6 | -0.809989130  | 1.021427642  | 2.969424981  | H |
| 6 | -2.259803130  | 1.127199642  | 2.494925981  | H |
| 6 | -2.375856130  | 1.348247642  | 0.989977981  | H |
| 7 | -3.729752695  | 1.735146967  | 0.360061547  | H |
| 1 | 2.513816870   | 0.408466642  | 1.469694981  | H |
| 1 | 1.337523870   | -0.040630358 | 4.066311981  | H |
| 1 | -0.087144130  | -0.313044358 | 1.401961981  | H |
| 1 | -0.568264130  | -1.134376358 | 2.885521981  | H |
| 1 | -0.788208130  | 1.030921642  | 4.063803981  | H |
| 1 | -0.249866130  | 1.897999642  | 2.635469981  | H |
| 1 | -2.827153130  | 0.233867642  | 2.767395981  | H |
| 1 | -2.729599130  | 1.975880642  | 3.002504981  | H |
| 1 | -1.729430130  | 2.173145642  | 0.681496981  | H |
| 1 | -2.066832130  | 0.451978642  | 0.450902981  | H |
| 1 | -4.072629695  | 2.543289967  | 0.872588547  | H |
| 1 | -3.643880565  | 2.089926318  | -0.650004584 | H |
| 1 | -4.369349130  | 0.900822642  | 0.799305981  | H |
| 1 | -5.966015130  | -2.805182358 | -3.435305019 | H |
| 1 | -0.545188130  | 6.130927642  | -4.110308019 | H |
| 8 | 3.368737870   | -4.645322358 | 3.749524981  | H |
| 8 | 2.710211870   | -1.854424358 | 1.798316981  | H |
| 1 | 4.771850870   | -6.333932358 | 4.191354981  | H |
| 1 | 2.265049870   | -3.242140358 | 3.620299981  | H |
| 1 | -7.312232130  | -3.026564358 | -1.636602019 | H |
| 8 | -7.873011130  | -2.406508358 | -1.116588019 | H |
| 1 | -5.981695130  | -1.201082358 | 1.512685981  | H |
| 8 | -6.841084130  | -1.649694358 | 1.356374981  | H |
| 6 | -7.796808130  | -0.705997358 | 1.306138981  | H |
| 6 | -9.068655130  | -0.993915358 | 0.956973981  | H |
| 6 | -9.558787130  | -2.306902358 | 0.528508981  | H |
| 6 | -10.691191130 | -2.876220358 | 1.108814981  | H |
| 6 | -11.139352130 | -4.138201358 | 0.745567981  | H |
| 1 | -12.013480130 | -4.572207358 | 1.216628981  | H |
| 6 | -10.433154130 | -4.848998358 | -0.226023019 | H |
| 6 | -9.318768130  | -4.294129358 | -0.845065019 | H |
| 1 | -8.812956130  | -4.850198358 | -1.623930019 | H |
| 6 | -8.890989130  | -3.017453358 | -0.487001019 | H |
| 8 | -10.803651130 | -6.098108358 | -0.622490019 | H |

|   |               |              |              |   |
|---|---------------|--------------|--------------|---|
| 1 | -11.589507130 | -6.363001358 | -0.129507019 | H |
| 6 | -7.382752130  | 0.655870642  | 1.652978981  | H |
| 8 | -6.200102130  | 0.861057642  | 1.922922981  | H |
| 6 | -8.449906130  | 1.647777642  | 1.643088981  | H |
| 6 | -8.249826130  | 3.022382642  | 1.931232981  | H |
| 8 | -6.993599130  | 3.435218642  | 2.195996981  | H |
| 1 | -7.006600130  | 4.388038642  | 2.354303981  | H |
| 6 | -9.311962130  | 3.908315642  | 1.934876981  | H |
| 1 | -9.169318130  | 4.958891642  | 2.153460981  | H |
| 6 | -10.602028130 | 3.449309642  | 1.644895981  | H |
| 6 | -10.841564130 | 2.119323642  | 1.346512981  | H |
| 6 | -9.758347130  | 1.240032642  | 1.344563981  | H |
| 8 | -11.589848130 | 4.377124642  | 1.666709981  | H |
| 1 | -12.429544130 | 3.955788642  | 1.446040981  | H |
| 1 | -11.827035130 | 1.744844642  | 1.103807981  | H |
| 1 | -11.216632130 | -2.318900358 | 1.874044981  | H |
| 8 | -10.051856130 | -0.036432358 | 1.017644981  | H |

--Link1--

#ONIOM(M052X/6-31++G(d,p):UFF) Opt

AQ-dimer

0 1 0 1 0 1

|   |             |              |              |       |
|---|-------------|--------------|--------------|-------|
| 7 | 6.828788267 | -3.764472796 | -0.803233307 | H     |
| 6 | 5.752543267 | -2.840652796 | -1.141341307 | H     |
| 6 | 4.782816267 | -2.666968796 | 0.031987693  | H     |
| 8 | 4.309587267 | -3.655483796 | 0.553311693  | H     |
| 6 | 4.959554267 | -3.407197796 | -2.330063307 | H     |
| 6 | 3.967826267 | -2.360203796 | -2.809312307 | H     |
| 8 | 4.366706267 | -1.340905796 | -3.334369307 | H     |
| 8 | 2.685432267 | -2.572546796 | -2.570573307 | H     |
| 1 | 6.427616267 | -4.558201796 | -0.313125307 | H     |
| 1 | 6.176850267 | -1.886196796 | -1.449815307 | H     |
| 1 | 5.671782267 | -3.600074796 | -3.130657307 | H     |
| 1 | 4.476423267 | -4.339539796 | -2.034556307 | H     |
| 7 | 4.454204267 | -1.343171796 | 0.517675693  | L H 3 |
| 6 | 3.759436267 | -1.116730796 | 1.790662693  | L     |
| 6 | 2.418247267 | -0.470753796 | 1.508465693  | L     |
| 8 | 2.153948267 | 0.632258204  | 1.960336693  | L     |
| 6 | 4.660084267 | -0.288490796 | 2.739210693  | L     |
| 6 | 4.034107267 | -0.136876796 | 4.085943693  | L     |
| 6 | 5.981832267 | -0.955364796 | 2.925082693  | L     |

|   |              |              |              |        |
|---|--------------|--------------|--------------|--------|
| 1 | 4.770937267  | -0.512071796 | -0.031356307 | L      |
| 1 | 3.550915267  | -2.089769796 | 2.290057693  | L      |
| 1 | 4.833277267  | 0.720289204  | 2.310178693  | L      |
| 7 | 1.498858267  | -1.140487796 | 0.765096693  | L      |
| 6 | 0.131718267  | -0.659794796 | 0.551137693  | L      |
| 6 | -0.785899733 | -1.113392796 | 1.653620693  | L      |
| 8 | -0.339587733 | -1.753467796 | 2.592765693  | L      |
| 1 | 1.731127267  | -2.098285796 | 0.421661693  | L      |
| 1 | 0.111486267  | 0.449314204  | 0.475432693  | L      |
| 1 | -0.244606733 | -1.067045796 | -0.407460307 | L      |
| 7 | -2.109502733 | -0.807154796 | 1.593058693  | L      |
| 6 | -3.075703733 | -1.144526796 | 2.647347693  | L      |
| 6 | -4.192286733 | -1.987944796 | 2.075921693  | L      |
| 8 | -4.827248733 | -1.571167796 | 1.120752693  | L      |
| 6 | -3.634143733 | 0.147892204  | 3.260946693  | L      |
| 8 | -4.500485733 | -0.138775796 | 4.325762693  | L      |
| 1 | -2.455503733 | -0.260824796 | 0.771245693  | L      |
| 1 | -2.575667733 | -1.706270796 | 3.466390693  | L      |
| 1 | -2.796793733 | 0.792775204  | 3.613209693  | L      |
| 1 | -4.194201733 | 0.719793204  | 2.493843693  | L      |
| 1 | -3.929911733 | -0.406644796 | 5.092719693  | L      |
| 7 | -4.504717733 | -3.188511796 | 2.639170693  | L      |
| 6 | -5.687241733 | -3.990064796 | 2.286447693  | L      |
| 6 | -5.659346733 | -4.381295796 | 0.825570693  | L H 53 |
| 8 | -6.576438733 | -4.070406796 | 0.076095693  | L      |
| 6 | -6.991388733 | -3.268313796 | 2.694341693  | L      |
| 6 | -7.018736733 | -2.955898796 | 4.162600693  | L      |
| 8 | -7.073415733 | -1.799561796 | 4.540797693  | L      |
| 7 | -7.000720733 | -3.951950796 | 5.068932693  | L      |
| 1 | -3.945688733 | -3.518804796 | 3.458392693  | L      |
| 1 | -5.643415733 | -4.942991796 | 2.860005693  | L      |
| 1 | -7.108700733 | -2.330125796 | 2.109238693  | L      |
| 1 | -7.862935733 | -3.917921796 | 2.460780693  | L      |
| 7 | -4.594858733 | -5.186858796 | 0.352799693  | H      |
| 6 | -3.957830733 | -4.655649796 | -0.845667307 | H      |
| 6 | -4.597012733 | -5.053928796 | -2.166290307 | H      |
| 8 | -5.558016733 | -5.980085796 | -2.059908307 | H      |
| 6 | -2.485495733 | -5.103477796 | -0.912567307 | H      |
| 6 | -1.683275733 | -4.488982796 | 0.229519693  | H      |
| 6 | -0.205999733 | -4.885262796 | 0.196485693  | H      |
| 6 | 0.497528267  | -4.400581796 | -1.068761307 | H      |
| 7 | 1.955306267  | -4.621477796 | -1.074684307 | H      |
| 1 | -4.946078733 | -6.122201796 | 0.193573693  | H      |

|   |              |              |              |        |
|---|--------------|--------------|--------------|--------|
| 1 | -3.928707733 | -3.563071796 | -0.843507307 | H      |
| 1 | -2.440451733 | -6.198051796 | -0.866099307 | H      |
| 1 | -2.082995733 | -4.786626796 | -1.874546307 | H      |
| 1 | -1.765240733 | -3.401885796 | 0.152543693  | H      |
| 1 | -2.134649733 | -4.788638796 | 1.176042693  | H      |
| 1 | 0.300923267  | -4.448266796 | 1.063181693  | H      |
| 1 | -0.102031733 | -5.972865796 | 0.281932693  | H      |
| 1 | 0.098125267  | -4.894074796 | -1.955068307 | H      |
| 1 | 0.313713267  | -3.331922796 | -1.202965307 | H      |
| 1 | 2.164694267  | -5.600742796 | -1.233530307 | H      |
| 1 | 2.314297733  | -3.864790204 | -1.727834693 | H      |
| 1 | 2.364169267  | -4.383919796 | -0.174334307 | H      |
| 7 | 0.627003267  | 5.954483204  | 1.829495693  | H      |
| 6 | 1.328234267  | 5.353687204  | 0.694298693  | H      |
| 6 | 0.233202267  | 5.051138204  | -0.337567307 | H      |
| 8 | -0.505365733 | 4.112696204  | -0.153714307 | H      |
| 6 | 2.058202267  | 4.053020204  | 1.020465693  | H      |
| 6 | 2.700634267  | 3.463255204  | -0.214293307 | H      |
| 8 | 2.540151267  | 3.960481204  | -1.319679307 | H      |
| 8 | 3.402264267  | 2.376393204  | 0.014354693  | H      |
| 1 | -0.040436733 | 5.277981204  | 2.185436693  | H      |
| 1 | 2.032190267  | 6.082653204  | 0.292357693  | H      |
| 1 | 2.814431267  | 4.200426204  | 1.796180693  | H      |
| 1 | 1.340217267  | 3.321853204  | 1.399629693  | H      |
| 7 | 0.042188267  | 5.906346204  | -1.492702307 | L H 77 |
| 6 | -0.546912733 | 7.201967204  | -1.105644307 | L      |
| 6 | -1.961561733 | 6.993043204  | -0.595007307 | L      |
| 8 | -2.797881733 | 6.494097204  | -1.331767307 | L      |
| 6 | -0.499784733 | 8.193891204  | -2.296309307 | L      |
| 6 | -1.211537733 | 7.673176204  | -3.501826307 | L      |
| 6 | -1.075538733 | 9.519356204  | -1.922302307 | L      |
| 1 | 0.981521267  | 6.066050204  | -1.925248307 | L      |
| 1 | 0.073560267  | 7.657054204  | -0.299468307 | L      |
| 1 | 0.561406267  | 8.362137204  | -2.578338307 | L      |
| 7 | -2.285268733 | 7.317052204  | 0.686060693  | L      |
| 6 | -3.581680733 | 6.988357204  | 1.279525693  | L      |
| 6 | -3.708718733 | 5.499680204  | 1.444222693  | L      |
| 8 | -2.921221733 | 4.916763204  | 2.171467693  | L      |
| 1 | -1.556307733 | 7.724297204  | 1.314405693  | L      |
| 1 | -3.666591733 | 7.470195204  | 2.277326693  | L      |
| 1 | -4.396393733 | 7.397237204  | 0.643225693  | L      |
| 7 | -4.675523733 | 4.813982204  | 0.776422693  | L      |
| 6 | -4.802050733 | 3.348474204  | 0.797503693  | L      |

|   |              |              |              |         |
|---|--------------|--------------|--------------|---------|
| 6 | -4.685805733 | 2.783389204  | -0.601547307 | L       |
| 8 | -4.670105733 | 3.536600204  | -1.561969307 | L       |
| 6 | -6.150917733 | 2.960391204  | 1.423007693  | L       |
| 8 | -6.246260733 | 3.456990204  | 2.730836693  | L       |
| 1 | -5.361586733 | 5.349026204  | 0.195602693  | L       |
| 1 | -3.989556733 | 2.894681204  | 1.405561693  | L       |
| 1 | -6.979064733 | 3.390663204  | 0.819650693  | L       |
| 1 | -6.281142733 | 1.854372204  | 1.429745693  | L       |
| 1 | -5.666167733 | 2.882223204  | 3.295696693  | L       |
| 7 | -4.590488733 | 1.436726204  | -0.781811307 | L       |
| 6 | -4.546086733 | 0.762708204  | -2.086719307 | L       |
| 6 | -3.337669733 | 1.220613204  | -2.886863307 | L H 127 |
| 8 | -3.460427733 | 2.069892204  | -3.757681307 | L       |
| 6 | -5.884009733 | 0.933468204  | -2.837319307 | L       |
| 6 | -5.953344733 | 0.056017204  | -4.055045307 | L       |
| 8 | -6.034237733 | 0.553737204  | -5.163666307 | L       |
| 7 | -5.940545733 | -1.284925796 | -3.927288307 | L       |
| 1 | -4.591683733 | 0.823969204  | 0.062897693  | L       |
| 1 | -4.425997733 | -0.325442796 | -1.892650307 | L       |
| 1 | -6.721348733 | 0.658289204  | -2.159861307 | L       |
| 1 | -6.031401733 | 1.995648204  | -3.129728307 | L       |
| 7 | -2.033637733 | 0.664386204  | -2.632964307 | H       |
| 6 | -1.762888733 | -0.414847796 | -3.563438307 | H       |
| 6 | -2.308348733 | -1.752378796 | -3.098403307 | H       |
| 8 | -2.698217733 | -2.525685796 | -4.101494307 | H       |
| 6 | -0.214618733 | -0.557041796 | -3.673382307 | H       |
| 6 | 0.410544267  | 0.700699204  | -4.282245307 | H       |
| 6 | 1.921888267  | 0.795566204  | -4.060013307 | H       |
| 6 | 2.272421267  | 0.974060204  | -2.583419307 | H       |
| 7 | 3.659432760  | 1.478450657  | -2.130146732 | H       |
| 1 | -2.039337733 | 0.220864204  | -1.706973307 | H       |
| 1 | -2.132912733 | -0.213785796 | -4.573602307 | H       |
| 1 | 0.178816267  | -0.745069796 | -2.674179307 | H       |
| 1 | 0.021078267  | -1.436971796 | -4.278402307 | H       |
| 1 | 0.190077267  | 0.720121204  | -5.353341307 | H       |
| 1 | -0.067824733 | 1.579315204  | -3.843197307 | H       |
| 1 | 2.440398267  | -0.083760796 | -4.447857307 | H       |
| 1 | 2.296390267  | 1.666388204  | -4.608925307 | H       |
| 1 | 1.620094267  | 1.732170204  | -2.143525307 | H       |
| 1 | 2.128417267  | 0.041910204  | -2.037359307 | H       |
| 1 | 3.858185760  | 2.305671657  | -2.685031732 | H       |
| 1 | 3.640658774  | 1.848968752  | -1.146054882 | H       |
| 1 | 4.304935267  | 0.659916204  | -2.621854307 | H       |

|   |              |              |              |   |
|---|--------------|--------------|--------------|---|
| 1 | 7.486971267  | -3.320386796 | -0.171810307 | H |
| 1 | 1.281611267  | 6.157252204  | 2.575825693  | H |
| 8 | -4.259097733 | -4.634472796 | -3.256679307 | H |
| 8 | -2.362792733 | -2.078274796 | -1.927104307 | H |
| 1 | -5.857485733 | -6.173535796 | -2.964002307 | H |
| 1 | -3.124260733 | -3.335283796 | -3.735462307 | H |
| 8 | 9.897067000  | -0.204767000 | 2.898073000  | H |
| 6 | 9.222763000  | -0.062700000 | 1.894973000  | H |
| 6 | 9.409445000  | -0.949891000 | 0.710163000  | H |
| 6 | 10.384588000 | -1.943224000 | 0.762844000  | H |
| 1 | 10.968679000 | -2.042134000 | 1.668058000  | H |
| 6 | 10.586691000 | -2.774074000 | -0.333453000 | H |
| 1 | 11.342558000 | -3.547798000 | -0.290844000 | H |
| 6 | 9.820177000  | -2.612654000 | -1.487504000 | H |
| 1 | 9.975370000  | -3.264604000 | -2.336839000 | H |
| 6 | 8.845515000  | -1.623679000 | -1.545304000 | H |
| 1 | 8.233701000  | -1.482983000 | -2.426937000 | H |
| 6 | 8.632062000  | -0.794591000 | -0.445208000 | H |
| 6 | 7.556318000  | 0.234613000  | -0.516974000 | H |
| 8 | 6.826102000  | 0.309152000  | -1.491038000 | H |
| 6 | 7.389490000  | 1.137449000  | 0.652003000  | H |
| 6 | 8.180554000  | 0.995305000  | 1.800725000  | H |
| 6 | 7.977100000  | 1.837112000  | 2.890870000  | H |
| 1 | 8.595903000  | 1.703612000  | 3.767981000  | H |
| 6 | 6.987714000  | 2.812566000  | 2.836524000  | H |
| 1 | 6.825810000  | 3.461976000  | 3.687293000  | H |
| 6 | 6.197862000  | 2.948281000  | 1.696127000  | H |
| 1 | 5.412506000  | 3.691406000  | 1.657550000  | H |
| 6 | 6.400183000  | 2.114649000  | 0.603227000  | H |
| 1 | 5.786544000  | 2.194264000  | -0.281613000 | H |

--Link1--

#ONIOM(M052X/6-31++G(d,p):UFF) OPT

TPT-dimer

0 1 0 1 0 1

|   |             |              |             |   |
|---|-------------|--------------|-------------|---|
| 7 | 4.757922431 | -3.640601955 | 3.691377281 | H |
| 6 | 3.741053431 | -2.977419955 | 2.882131281 | H |
| 6 | 2.496134431 | -2.660319955 | 3.724724281 | H |
| 8 | 1.881588431 | -3.579999955 | 4.224202281 | H |
| 6 | 3.324179431 | -3.907534955 | 1.731375281 | H |

|   |               |              |              |        |
|---|---------------|--------------|--------------|--------|
| 6 | 2.520436431   | -3.117016955 | 0.717978281  | H      |
| 8 | 3.078748431   | -2.304038955 | -0.002151719 | H      |
| 8 | 1.221194431   | -3.280063955 | 0.690200281  | H      |
| 1 | 4.316184431   | -4.369423955 | 4.242924281  | H      |
| 1 | 4.183545431   | -2.073320955 | 2.460796281  | H      |
| 1 | 4.231347431   | -4.266118955 | 1.248655281  | H      |
| 1 | 2.763895431   | -4.750918955 | 2.137157281  | H      |
| 7 | 2.100340431   | -1.335314955 | 3.922636281  | L H 3  |
| 6 | 0.945885431   | -0.952361955 | 4.746715281  | L      |
| 6 | -0.115987569  | -0.373609955 | 3.836526281  | L      |
| 8 | -0.484359569  | 0.782608045  | 3.968920281  | L      |
| 6 | 1.399341431   | 0.016959045  | 5.865905281  | L      |
| 6 | 0.267645431   | 0.357356045  | 6.778373281  | L      |
| 6 | 2.477611431   | -0.601155955 | 6.691566281  | L      |
| 1 | 2.643512431   | -0.574544955 | 3.455590281  | L      |
| 1 | 0.501891431   | -1.848971955 | 5.235605281  | L      |
| 1 | 1.794926431   | 0.954240045  | 5.418342281  | L      |
| 7 | -0.657208569  | -1.158165955 | 2.868464281  | L      |
| 6 | -1.652187569  | -0.692637955 | 1.900636281  | L      |
| 6 | -3.039459569  | -1.120729955 | 2.294830281  | L      |
| 8 | -3.211214569  | -1.768524955 | 3.315414281  | L      |
| 1 | -0.357484569  | -2.155274955 | 2.804588281  | L      |
| 1 | -1.625401569  | 0.413270045  | 1.800311281  | L      |
| 1 | -1.405936569  | -1.122159955 | 0.908334281  | L      |
| 7 | -4.095862569  | -0.764639955 | 1.516188281  | L      |
| 6 | -5.499406569  | -1.024270955 | 1.870305281  | L      |
| 6 | -6.231196569  | -1.644445955 | 0.701108281  | L      |
| 8 | -6.108532569  | -1.155318955 | -0.408997719 | L      |
| 6 | -6.170349569  | 0.294396045  | 2.283844281  | L      |
| 8 | -7.492738569  | 0.074071045  | 2.695763281  | L      |
| 1 | -3.904290569  | -0.195341955 | 0.660812281  | L      |
| 1 | -5.556461569  | -1.716096955 | 2.739269281  | L      |
| 1 | -5.589998569  | 0.770495045  | 3.107005281  | L      |
| 1 | -6.178218569  | 1.004624045  | 1.431058281  | L      |
| 1 | -7.444949569  | -0.340561955 | 3.596511281  | L      |
| 7 | -7.048917569  | -2.717094955 | 0.889627281  | L      |
| 6 | -7.902353569  | -3.301742955 | -0.157761719 | L      |
| 6 | -7.060220569  | -3.824681955 | -1.300084719 | L H 53 |
| 8 | -7.204168569  | -3.397749955 | -2.438520719 | L      |
| 6 | -8.994741569  | -2.308595955 | -0.615903719 | L      |
| 6 | -9.830906569  | -1.830065955 | 0.535425281  | L      |
| 8 | -9.850575569  | -0.647649955 | 0.826708281  | L      |
| 7 | -10.575671569 | -2.701792955 | 1.241951281  | L      |



|   |              |              |              |        |
|---|--------------|--------------|--------------|--------|
| 1 | -7.150183569 | -3.109088955 | 1.853389281  | L      |
| 1 | -8.422046569 | -4.186706955 | 0.273058281  | L      |
| 1 | -8.534136569 | -1.437680955 | -1.130710719 | L      |
| 1 | -9.663981569 | -2.809366955 | -1.348956719 | L      |
| 7 | -6.122429569 | -4.851190955 | -1.040043719 | H      |
| 6 | -4.754746569 | -4.467186955 | -1.356580719 | H      |
| 6 | -4.331673569 | -4.907557955 | -2.747063719 | H      |
| 8 | -4.843160569 | -5.796652955 | -3.358352719 | H      |
| 6 | -3.781784569 | -5.222037955 | -0.419960719 | H      |
| 6 | -3.823440569 | -4.655474955 | 0.997551281  | H      |
| 6 | -2.669703569 | -5.159977955 | 1.873464281  | H      |
| 6 | -1.324519569 | -4.697538955 | 1.317305281  | H      |
| 7 | -0.145015569 | -4.927483955 | 2.172951281  | H      |
| 1 | -6.378786569 | -5.673861955 | -1.574372719 | H      |
| 1 | -4.574442569 | -3.402062955 | -1.220057719 | H      |
| 1 | -4.073453569 | -6.276712955 | -0.419449719 | H      |
| 1 | -2.776932569 | -5.146565955 | -0.828082719 | H      |
| 1 | -3.751920569 | -3.566350955 | 0.933776281  | H      |
| 1 | -4.787880569 | -4.890363955 | 1.449448281  | H      |
| 1 | -2.789251569 | -4.764617955 | 2.887295281  | H      |
| 1 | -2.693448569 | -6.252258955 | 1.949777281  | H      |
| 1 | -1.106915569 | -5.182588955 | 0.366273281  | H      |
| 1 | -1.370480569 | -3.630183955 | 1.100845281  | H      |
| 1 | 0.039870431  | -5.918503955 | 2.280996281  | H      |
| 1 | 0.501448569  | -4.333305045 | 1.641799719  | H      |
| 1 | -0.268845569 | -4.545537955 | 3.105724281  | H      |
| 7 | -1.351594569 | 5.553207045  | 2.206809281  | H      |
| 6 | -0.327538569 | 4.778520045  | 1.499387281  | H      |
| 6 | -0.866403569 | 4.604714045  | 0.075566281  | H      |
| 8 | -1.771470569 | 3.827032045  | -0.127841719 | H      |
| 6 | -0.053555569 | 3.402493045  | 2.096159281  | H      |
| 6 | 1.004579431  | 2.650058045  | 1.302830281  | H      |
| 8 | 1.367210431  | 3.124500045  | 0.209351281  | H      |
| 8 | 1.452676431  | 1.565161045  | 1.811795281  | H      |
| 1 | -2.192236569 | 4.986801045  | 2.249356281  | H      |
| 1 | 0.594608431  | 5.359492045  | 1.479528281  | H      |
| 1 | 0.263096431  | 3.483076045  | 3.139202281  | H      |
| 1 | -0.976017569 | 2.816747045  | 2.077227281  | H      |
| 7 | -0.353135569 | 5.411699045  | -1.015561719 | L H 77 |
| 6 | -0.769209569 | 6.821774045  | -0.887938719 | L      |
| 6 | -2.277694569 | 6.932701045  | -1.020268719 | L      |
| 8 | -2.823075569 | 6.506646045  | -2.026325719 | L      |
| 6 | -0.031804569 | 7.695678045  | -1.934508719 | L      |

|   |              |              |              |         |
|---|--------------|--------------|--------------|---------|
| 6 | -0.284723569 | 7.242873045  | -3.335219719 | L       |
| 6 | -0.414044569 | 9.133059045  | -1.808330719 | L       |
| 1 | 0.691293431  | 5.355923045  | -0.986258719 | L       |
| 1 | -0.457051569 | 7.203227045  | 0.111436281  | L       |
| 1 | 1.061498431  | 7.626900045  | -1.750233719 | L       |
| 7 | -3.021485569 | 7.461761045  | -0.010849719 | L       |
| 6 | -4.481675569 | 7.374304045  | 0.014847281  | L       |
| 6 | -4.891551569 | 5.956618045  | 0.292644281  | L       |
| 8 | -4.662271569 | 5.480791045  | 1.392136281  | L       |
| 1 | -2.544658569 | 7.805603045  | 0.853224281  | L       |
| 1 | -4.882767569 | 8.035178045  | 0.813257281  | L       |
| 1 | -4.896800569 | 7.734229045  | -0.951723719 | L       |
| 7 | -5.470145569 | 5.204790045  | -0.681363719 | L       |
| 6 | -5.690441569 | 3.755022045  | -0.566827719 | L       |
| 6 | -4.923868569 | 3.016079045  | -1.642496719 | L       |
| 8 | -4.407433569 | 3.637769045  | -2.556596719 | L       |
| 6 | -7.192105569 | 3.451483045  | -0.675484719 | L       |
| 8 | -7.899467569 | 4.105136045  | 0.343464281  | L       |
| 1 | -5.710822569 | 5.660278045  | -1.591824719 | L       |
| 1 | -5.328889569 | 3.378671045  | 0.415702281  | L       |
| 1 | -7.574536569 | 3.806461045  | -1.656678719 | L       |
| 1 | -7.377316569 | 2.354339045  | -0.619293719 | L       |
| 1 | -7.723085569 | 3.600042045  | 1.180018281  | L       |
| 7 | -4.818487569 | 1.659819045  | -1.583032719 | L       |
| 6 | -4.183976569 | 0.801212045  | -2.595689719 | L       |
| 6 | -2.680519569 | 1.003270045  | -2.608679719 | L H 127 |
| 8 | -2.205899569 | 2.044332045  | -3.035632719 | L       |
| 6 | -4.826319569 | 1.014431045  | -3.985267719 | L       |
| 6 | -4.550739569 | -0.129085955 | -4.916653719 | L       |
| 8 | -3.837152569 | 0.032223045  | -5.890417719 | L       |
| 7 | -5.114715569 | -1.332026955 | -4.696373719 | L       |
| 1 | -5.241648569 | 1.179598045  | -0.760839719 | L       |
| 1 | -4.378631569 | -0.252622955 | -2.296217719 | L       |
| 1 | -5.928396569 | 1.109600045  | -3.872957719 | L       |
| 1 | -4.459834569 | 1.958763045  | -4.442492719 | L       |
| 7 | -1.806679569 | 0.020227045  | -2.086164719 | H       |
| 6 | -1.661555569 | -1.150596955 | -2.939413719 | H       |
| 6 | -2.360502569 | -2.382898955 | -2.391738719 | H       |
| 8 | -3.014648569 | -3.041117955 | -3.398054719 | H       |
| 6 | -0.175012569 | -1.587003955 | -2.993273719 | H       |
| 6 | 0.728024431  | -0.466387955 | -3.535811719 | H       |
| 6 | 1.928239431  | -0.194096955 | -2.621450719 | H       |
| 6 | 1.490422431  | 0.438233045  | -1.308166719 | H       |

|   |              |              |              |   |
|---|--------------|--------------|--------------|---|
| 7 | 2.625231431  | 0.515630045  | -0.350823719 | H |
| 1 | -2.064820569 | -0.209895955 | -1.137637719 | H |
| 1 | -1.994204569 | -0.973987955 | -3.962758719 | H |
| 1 | 0.116619431  | -1.866688955 | -1.977279719 | H |
| 1 | -0.082740569 | -2.488385955 | -3.605536719 | H |
| 1 | 1.073319431  | -0.735301955 | -4.537397719 | H |
| 1 | 0.151968431  | 0.456689045  | -3.628792719 | H |
| 1 | 2.465866431  | -1.126879955 | -2.421920719 | H |
| 1 | 2.626752431  | 0.495946045  | -3.107446719 | H |
| 1 | 1.108943431  | 1.447563045  | -1.438250719 | H |
| 1 | 0.717811431  | -0.150395955 | -0.816635719 | H |
| 1 | 3.429955431  | 1.044616045  | -0.712625719 | H |
| 1 | 2.939743431  | -0.439105955 | -0.151867719 | H |
| 1 | 5.179464431  | -2.981345955 | 4.336489281  | H |
| 1 | -1.054021569 | 5.713231045  | 3.162398281  | H |
| 8 | -3.085226569 | -4.455104955 | -3.224436719 | H |
| 8 | -2.289767569 | -2.768128955 | -1.258276719 | H |
| 1 | 3.329244431  | -0.689300955 | -4.789852719 | H |
| 8 | 3.912769431  | -1.390847955 | -5.103535719 | H |
| 6 | 5.206019431  | -1.020536955 | -4.880704719 | H |
| 6 | 5.543121431  | 0.185408045  | -4.271811719 | H |
| 1 | 4.778178431  | 0.876006045  | -3.937949719 | H |
| 6 | 6.209607431  | -1.898765955 | -5.289417719 | H |
| 1 | 5.927304431  | -2.828020955 | -5.765667719 | H |
| 6 | 7.540007431  | -1.567832955 | -5.075688719 | H |
| 1 | 8.316027431  | -2.256074955 | -5.392804719 | H |
| 6 | 7.899354431  | -0.362971955 | -4.462667719 | H |
| 6 | 6.880837431  | 0.509164045  | -4.071486719 | H |
| 1 | 7.113402431  | 1.455073045  | -3.591544719 | H |
| 6 | 9.342723431  | -0.051384955 | -4.144973719 | H |
| 1 | 9.491849431  | 1.029466045  | -4.104991719 | H |
| 1 | 10.008702431 | -0.454448955 | -4.908589719 | H |
| 6 | 9.762751431  | -0.629656955 | -2.775128719 | H |
| 6 | 9.772634431  | -2.152352955 | -2.815919719 | H |
| 8 | 9.054802431  | -2.880975955 | -2.181529719 | H |
| 8 | 10.693471431 | -2.610374955 | -3.686036719 | H |
| 1 | 10.648649431 | -3.579898955 | -3.649477719 | H |
| 1 | 10.774411431 | -0.309486955 | -2.523943719 | H |
| 7 | 8.860104431  | -0.170993955 | -1.752424719 | H |
| 1 | 7.878748431  | -0.210788955 | -1.992343719 | H |
| 6 | 9.170826431  | -0.366655955 | -0.438085719 | H |
| 8 | 10.289322431 | -0.654729955 | -0.051254719 | H |
| 6 | 8.019772431  | -0.167574955 | 0.550884281  | H |

|   |             |              |              |   |
|---|-------------|--------------|--------------|---|
| 1 | 8.331096431 | 0.583260045  | 1.273384281  | H |
| 6 | 7.697492431 | -1.483511955 | 1.274185281  | H |
| 1 | 8.598775431 | -2.072946955 | 1.430472281  | H |
| 1 | 7.252186431 | -1.244558955 | 2.243687281  | H |
| 6 | 6.669760431 | -2.138123955 | 0.348938281  | H |
| 1 | 7.173421431 | -2.579345955 | -0.513030719 | H |
| 1 | 6.084910431 | -2.909788955 | 0.847061281  | H |
| 6 | 5.807901431 | -0.955776955 | -0.091638719 | H |
| 1 | 5.352394431 | -1.081273955 | -1.072992719 | H |
| 1 | 5.016641431 | -0.744378955 | 0.631901281  | H |
| 7 | 6.749425431 | 0.172573045  | -0.097150719 | H |
| 6 | 6.371617431 | 1.362449045  | -0.614825719 | H |
| 8 | 5.287900431 | 1.500507045  | -1.187193719 | H |
| 6 | 7.309321431 | 2.555265045  | -0.424193719 | H |
| 1 | 8.158345431 | 2.259571045  | 0.195873281  | H |
| 1 | 5.788590431 | 4.051334045  | -0.358856719 | H |
| 7 | 7.733946431 | 3.067653045  | -1.725706719 | H |
| 1 | 8.568873431 | 2.574283045  | -2.021517719 | H |
| 1 | 7.981154431 | 4.046838045  | -1.634858719 | H |
| 6 | 6.506609431 | 3.623367045  | 0.343276281  | H |
| 6 | 5.765218431 | 3.022716045  | 1.499332281  | H |
| 6 | 4.408151431 | 2.841556045  | 1.537746281  | H |
| 1 | 3.648159431 | 3.182220045  | 0.848655281  | H |
| 7 | 4.055516431 | 2.080811045  | 2.621690281  | H |
| 1 | 3.093053431 | 1.795151045  | 2.774469281  | H |
| 6 | 5.187178431 | 1.726646045  | 3.306033281  | H |
| 6 | 6.294044431 | 2.316135045  | 2.636905281  | H |
| 6 | 5.346702431 | 0.927704045  | 4.442170281  | H |
| 1 | 4.489557431 | 0.499014045  | 4.945803281  | H |
| 6 | 6.633238431 | 0.721282045  | 4.912149281  | H |
| 1 | 6.788442431 | 0.112808045  | 5.794530281  | H |
| 6 | 7.743131431 | 1.311094045  | 4.277308281  | H |
| 1 | 8.734122431 | 1.145888045  | 4.680437281  | H |
| 6 | 7.582383431 | 2.109788045  | 3.156934281  | H |
| 1 | 8.444348431 | 2.576616045  | 2.692323281  | H |
| 1 | 7.197008431 | 4.414271045  | 0.654797281  | H |
| 1 | 2.266932431 | 0.966828045  | 0.553907281  | H |
